# Supplementary material
Source: Springer Nature journal article supplement (https://www.springermedizin.de/resource/supplementary/13018_2013_492_MOESM1_ESM.pdf/9636892)

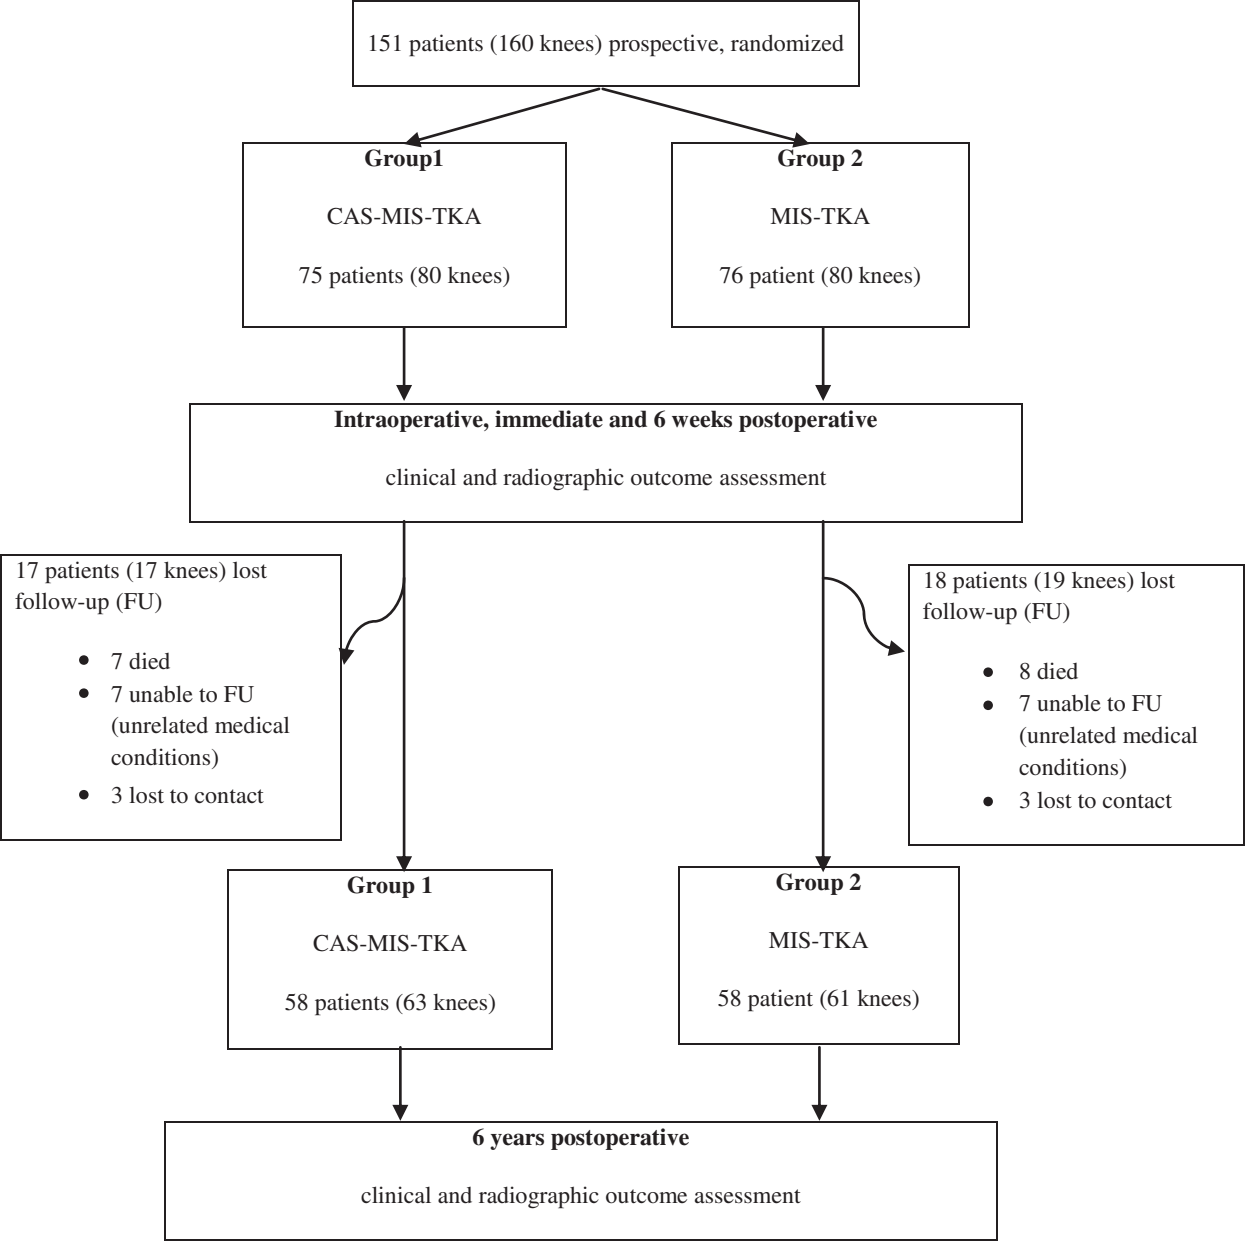

Supplement: MOESM1 [file 9636892]
